# Supplementary material for: Effects of Different Concentrations of Ganpu Tea on Fecal Microbiota and Short Chain Fatty Acids in Mice
Source: MDPI journal article supplement (doi:10.3390/nu13113715), 2021-10-22
Supplement: s1 [file s1]

## Supplemental Material of CW Manuscript

**Table S1.** Standard equations of eight SCFAs.

| Name             | Range<br>( $\mu\text{g/mL}$ ) | Curve Equation                            | R <sup>2</sup> | Limit of<br>Quantitation |
|------------------|-------------------------------|-------------------------------------------|----------------|--------------------------|
| Acetic acid      | 0.2–400                       | $y = 0.251995 * x + 0.004574$             | 0.997          | 0.2                      |
| Propanoic acid   | 0.2–400                       | $y = 0.350989 * x - 0.002259$             | 0.998          | 0.2                      |
| Butanoic acid    | 0.2–400                       | $y = 1.049535 * x + 1.913722\text{E-}004$ | 0.998          | 0.2                      |
| Isobutyric acid  | 0.1–200                       | $y = 0.936800 * x + 7.791846\text{E-}005$ | 0.994          | 0.1                      |
| Valeric acid     | 0.1–200                       | $y = 1.272853 * x - 1.945562\text{E-}004$ | 0.997          | 0.1                      |
| Isovaleric acid  | 0.1–200                       | $y = 1.493061 * x + 1.308246\text{E-}004$ | 0.993          | 0.1                      |
| Hexanoic acid    | 0.1–200                       | $y = 0.665629 * x + 0.001153$             | 0.995          | 0.1                      |
| Isohexanoic acid | 0.1–200                       | $y = 0.467166 * x + 1.814266\text{E-}004$ | 0.996          | 0.1                      |

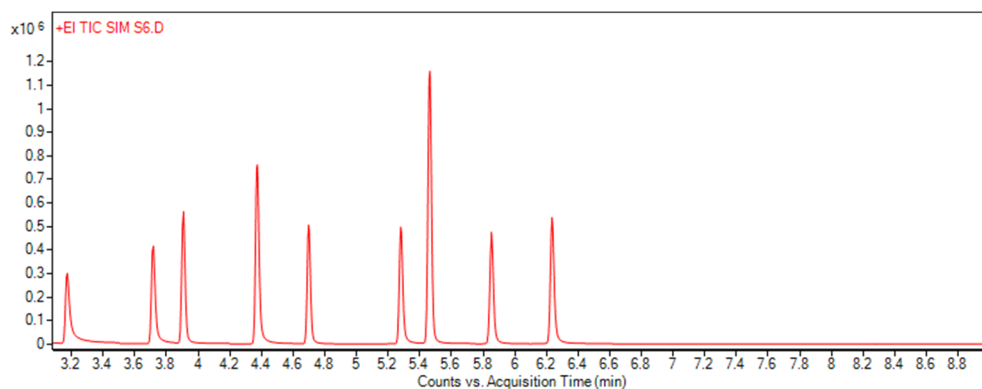

(A) standard solution

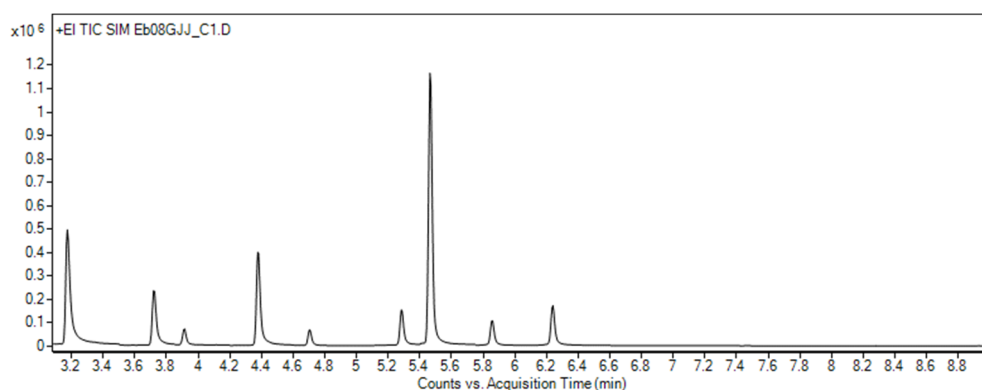

(B) Sample

**Figure S1.** the gas chromatographic diagram of the standard solution and sample.
